# Supplementary material
Source: publisher figshare collection journal article supplement (https://sage.figshare.com/ndownloader/files/15168836)
Supplement: Supplementary file 1 [file 15168836]

**Supplemental Table S2.** Overall opinion of therapists and suggestions for improvement regarding the teletreatment

| Theme mentioned by therapists (N/%)                             | Example statements                                                                                                                                                                                                                                                  |
|-----------------------------------------------------------------|---------------------------------------------------------------------------------------------------------------------------------------------------------------------------------------------------------------------------------------------------------------------|
| <b>Perceived benefits</b> (8/80.0)                              |                                                                                                                                                                                                                                                                     |
| ▪ Practicability                                                | ▪ <i>The mirror is somewhat bulky, using the tablet is much more practical</i> (Male, 37 yrs)                                                                                                                                                                       |
| ▪ Mobility and independence of user                             | ▪ <i>In our clinic, we always have too little space and internet connection is not everywhere available; with the tablet I can go wherever I want</i> (Female, 54 yrs)                                                                                              |
| ▪ Work-life balance                                             | ▪ <i>The advantage for me was that I could also use the teletreatment at home, which was favourable for my work-life balance</i> (Female, 48 yrs)                                                                                                                   |
| ▪ Self-efficacy                                                 | ▪ <i>It is great to provide the patient with a tool, which enables him to take more responsibility and to get more independent</i> (Female, 57 yrs)                                                                                                                 |
| ▪ Pain                                                          | ▪ <i>You immediately saw that the patient had benefit and didn't suffer anymore that much from the pain</i> (Female, 57 yrs)<br>▪ <i>It particularly motivates younger patients who are used to these kind of media</i> (Female, 54 yrs)                            |
| ▪ Motivation and empowerment of patients                        | ▪ <i>Patients appreciated that they were actively involved in the design of the platform and the selection of exercises</i> (Female, 54 yrs)                                                                                                                        |
| ▪ Sign of quality and innovation                                | ▪ <i>My portfolio and skills improved by using the technology and this was well received by patients</i> (Female, 57 yrs)<br>▪ <i>For me as therapist it is quite „cool“ to work with it, you keep up with the times</i> (Female, 48 yrs)                           |
| <b>Creating a long-term relationship with patients</b> (5/50.0) | ▪ <i>You can better supervise patients' self-management on the long-term, remind them what they can do themselves and control their training</i> (Female, 28 yrs)<br>▪ <i>It's an easy way to communicate with patients and to stay in contact</i> (Female, 57 yrs) |
| <b>Aspects related to digital exercise programs</b> (5/50.0)    |                                                                                                                                                                                                                                                                     |
| ▪ Tailoring                                                     | ▪ <i>Every patient was different regarding which exercises had effect; the diversification of exercises enabled a tailored treatment program</i> (Female, 57 yrs)                                                                                                   |
| ▪ Access to treatment programs                                  | ▪ <i>By using the teletreatment many patients could easier access mental practice and relaxation exercises, which normally is a bit more difficult for them</i> (Female, 48 yrs)                                                                                    |
| ▪ Vividness/realism                                             | ▪ <i>I was astonished by how real the image of the missing limb on the tablet was</i> (Male, 54 yrs)                                                                                                                                                                |
| <b>Design and usability</b> (4/40.0)                            | ▪ <i>I got used to it very quickly, it was very easy to use</i> (Male, 42 yrs)<br>▪ <i>The set-up and design was clear and descriptive</i> (Female, 50 yrs)<br>▪ <i>I enjoyed using it as the design was very lovely and appealing</i> (Female, 48 yrs)             |
| <b>Technical problems</b> (8/80.0)                              |                                                                                                                                                                                                                                                                     |
| ▪ Internet access                                               | ▪ <i>The physiotherapy department at our clinic is in the basement and I had some problems using the tablet because there is no Wi-Fi available and mobile Internet was too bad</i> (Male, 42 yrs)                                                                  |
| ▪ Bugs                                                          | ▪ <i>In the beginning the program was somewhat unstable and crashed sometimes</i> (Female, 50 yrs)                                                                                                                                                                  |
| <b>Training of the users</b> (5/50.0)                           |                                                                                                                                                                                                                                                                     |
| ▪ Intensity of training                                         | ▪ <i>I need to work with it more regularly to get more confident</i> (Female, 54 yrs)                                                                                                                                                                               |

|                                                                                                                          |                                                                                                                                                                                                                                                                                                                                                                                                                                                                                                                                                                                                                               |
|--------------------------------------------------------------------------------------------------------------------------|-------------------------------------------------------------------------------------------------------------------------------------------------------------------------------------------------------------------------------------------------------------------------------------------------------------------------------------------------------------------------------------------------------------------------------------------------------------------------------------------------------------------------------------------------------------------------------------------------------------------------------|
| <ul style="list-style-type: none"> <li>▪ Timing of training</li> <li>▪ Introduction patients to teletreatment</li> </ul> | <ul style="list-style-type: none"> <li>▪ <i>It would be useful to have one weekly meeting with other therapists and someone from the project team to discuss topics and provide feedback</i> (Female, 48 yrs)</li> <li>▪ <i>Now, we were trained before the trial started, but the first patient started 8 weeks later; because we treated just a few patients we didn't exactly know how it worked anymore</i> (Male, 54 yrs)</li> <li>▪ <i>For some (older) patients 5-6 sessions would have been useful to introduce them sufficiently, otherwise they are afraid of doing something wrong</i> (Female, 57 yrs)</li> </ul> |
| <b>Selection of eligible patients</b><br>(3/30.0)                                                                        | <ul style="list-style-type: none"> <li>▪ <i>Geriatric patients with impaired cognitive functions were a bit overstrained</i> (Female, 54 yrs)</li> <li>▪ <i>Ideally patients should already have some computer literacy and get familiar with the technology quickly</i> (Female, 57 yrs)</li> </ul>                                                                                                                                                                                                                                                                                                                          |
| <b>Suggestions for improvement</b><br>(3/30.0)                                                                           |                                                                                                                                                                                                                                                                                                                                                                                                                                                                                                                                                                                                                               |
| Enhance exercise programs                                                                                                | <ul style="list-style-type: none"> <li>▪ <i>Some exercises were shown quite plain. The program could be enhanced by more detailed tasks using different levels, scores and functional exercises</i> (Female, 28 yrs)</li> </ul>                                                                                                                                                                                                                                                                                                                                                                                               |
| Peer support                                                                                                             | <ul style="list-style-type: none"> <li>▪ <i>Younger patients could instruct older ones how to use the platform</i> (Female, 57 yrs)</li> </ul>                                                                                                                                                                                                                                                                                                                                                                                                                                                                                |
| Incorporate online community moderator                                                                                   | <ul style="list-style-type: none"> <li>▪ <i>A moderator of the patient chat would be useful, as some patients wanted to get in contact, but response was limited</i> (Female, 57 yrs)</li> </ul>                                                                                                                                                                                                                                                                                                                                                                                                                              |
